# Supplementary material for: Folate receptor-α targeted delivery of berberine via folate-functionalized bovine serum albumin nanocarriers to enhance intracellular internalization and suppress 3D spheroid formation as a pioneering therapeutic modality for glioblastoma
Source: Royal Society of Chemistry journal article supplement (doi:10.1039/d5tb01715g), 2026-01-01
Supplement: d5tb01715g1.pdf [file d5tb01715g1.pdf]

## Supplementary information

**Manuscript ID:** TB-ART-07-2025-001715

**TITLE:** Folate Receptor- $\alpha$  Targeted Delivery of Berberine via Folate-Functionalized Bovine Serum Albumin Nanocarriers to Enhance Intracellular Internalization and Suppress 3D Spheroid Formation to Pioneer Therapeutic Modalities for Glioblastoma

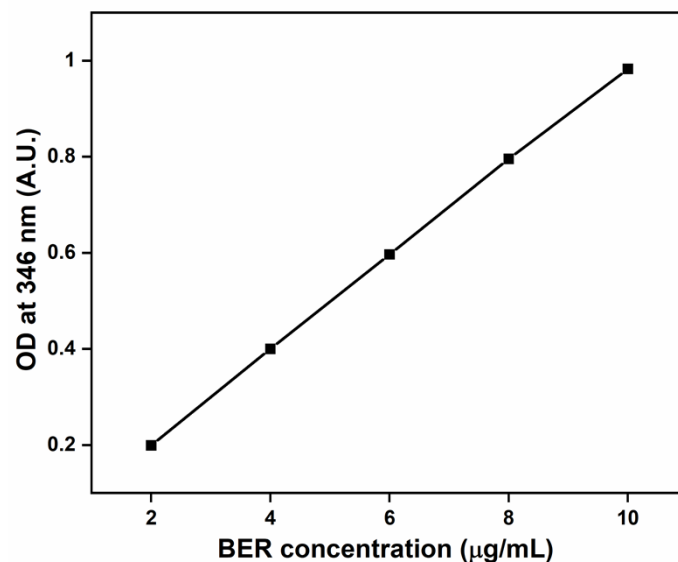

**Figure. S1** Standard curve of berberine concentration (μg/mL) with absorbance measured at 346 nm.

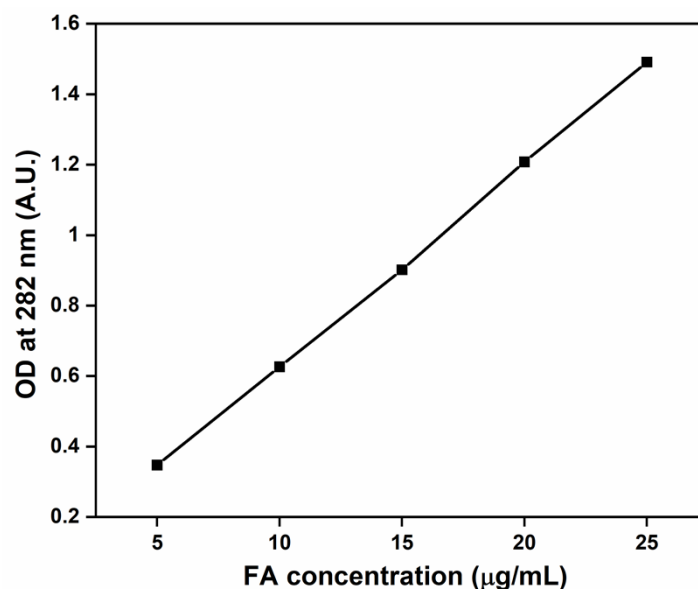

**Figure. S2** Standard curve of folic acid concentration (μg/mL) with absorbance measured at 282 nm.

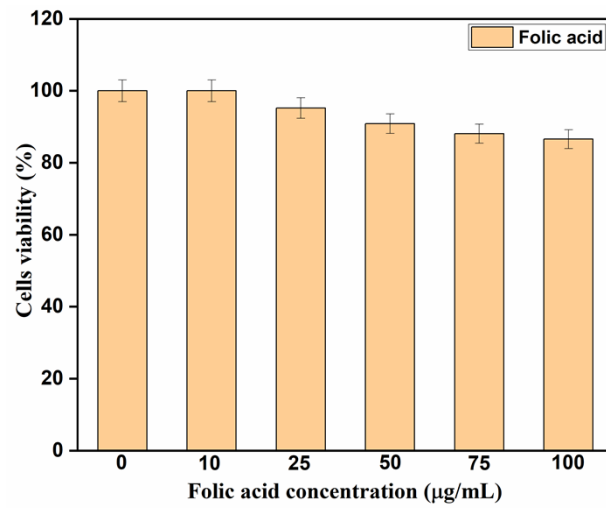

**Figure. S3** In vitro cytotoxicity assessment of LN229 cells following treatment with varying concentrations of folic acid.

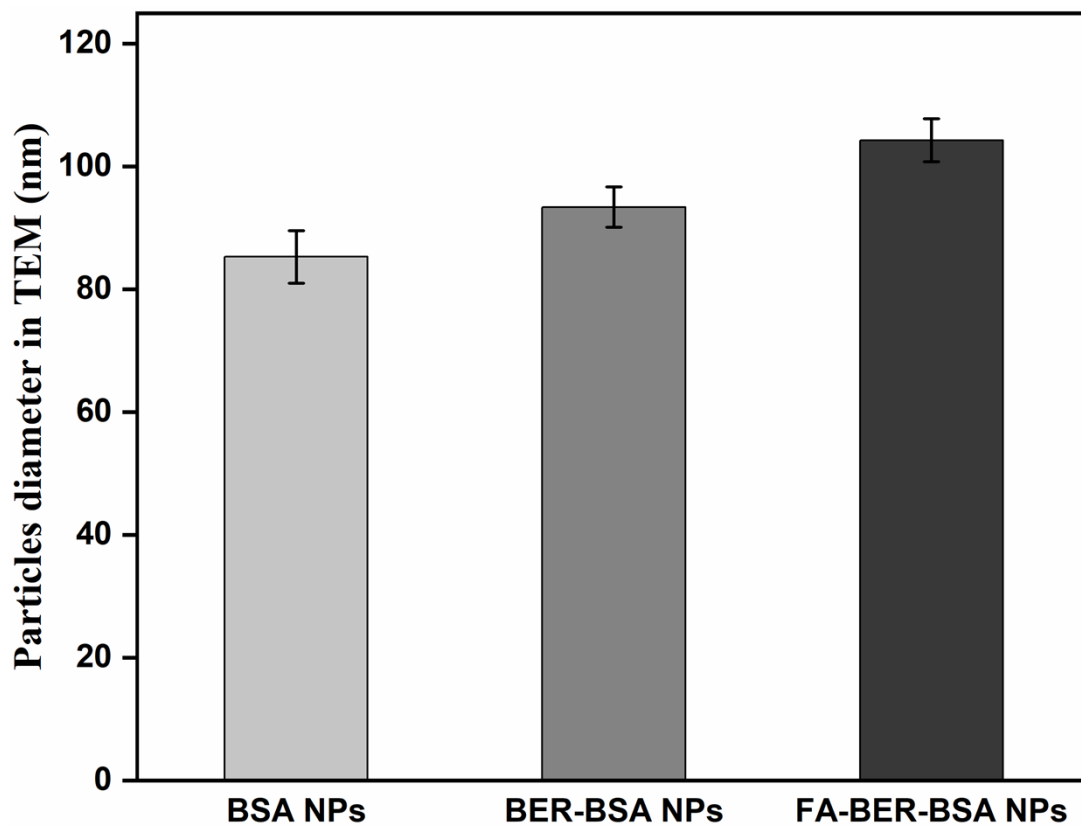

**Figure. S4** Graphical illustrations depicting the diameters of TEM images for BSA nanoparticles, BER-BSA nanoparticles, and FA-BER-BSA nanoparticles.

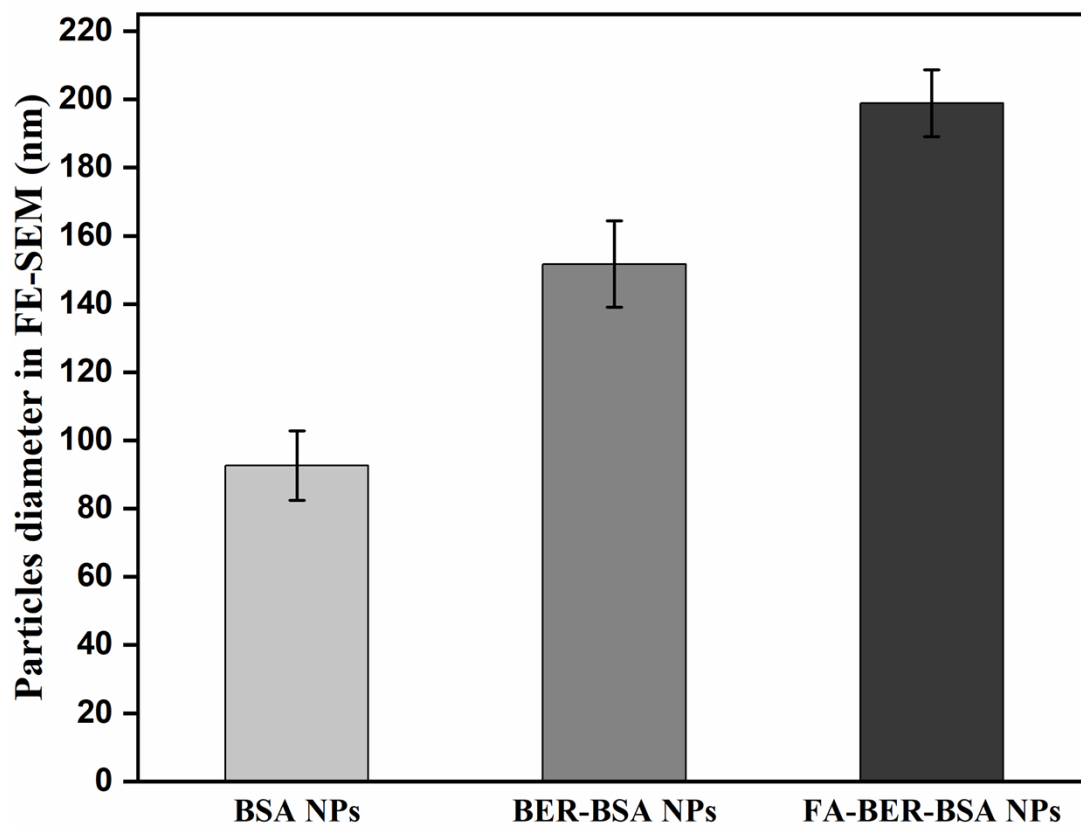

**Figure. S5** Graphical illustrations depicting the diameters of FESEM images for BSA nanoparticles, BER-BSA nanoparticles, and FA-BER-BSA nanoparticles.
